# Supplementary material for: Anomalous modulation of photoinduced electron transfer of coumarin 102 in aniline–dimethylaniline mixture: dominant role of hydrogen bonding
Source: Royal Society of Chemistry journal article supplement (doi:10.1039/c4cp04441j), 2014-10-30
Supplement: c4cp04441j1.pdf [file c4cp04441j1.pdf]

Electronic Supplementary Information

**Anomalous modulation of photoinduced electron  
transfer of coumarin 102 in aniline-  
dimethylaniline mixture: dominant role of  
hydrogen bonding**

*Nabajeet Barman, and Kalyanasis Sahu\**

Department of Chemistry, Indian Institute of Technology Guwahati, Guwahati 781039, Assam,  
India

\*To whom correspondence should be addressed. Email: [ksahu@iitg.ernet.in](mailto:ksahu@iitg.ernet.in)

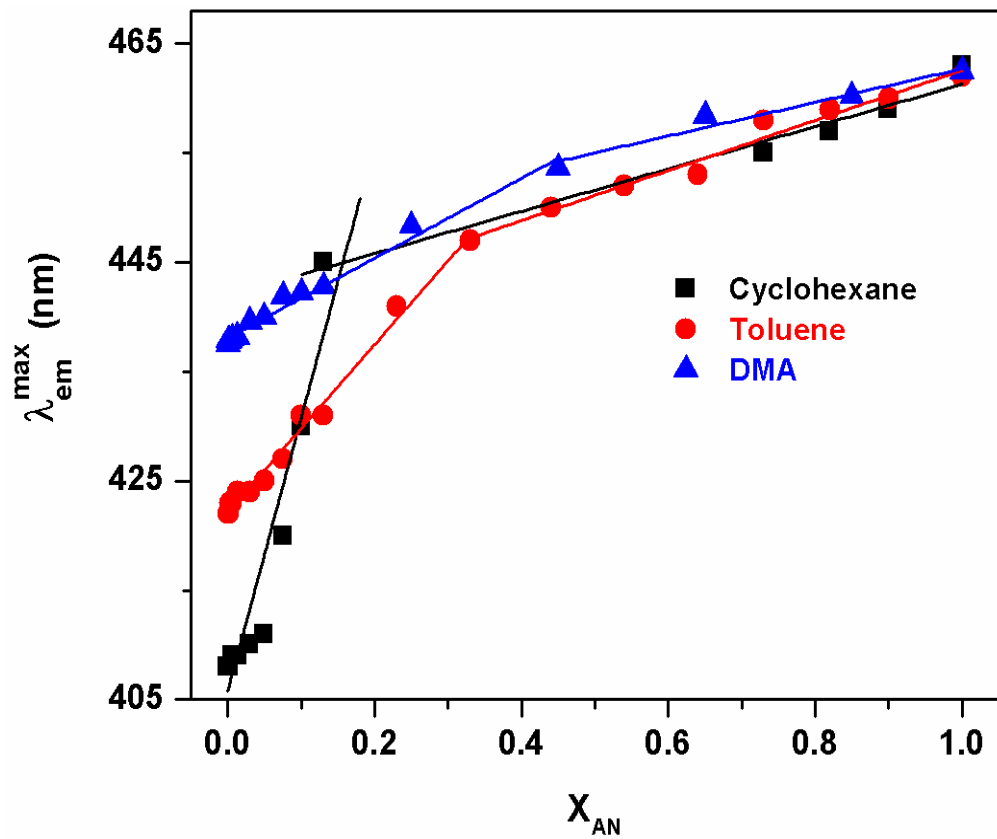

**Figure S1:** Variation of emission maxima of C102 with increasing mole fraction of aniline,  $X_{AN}$  in three different solvents.

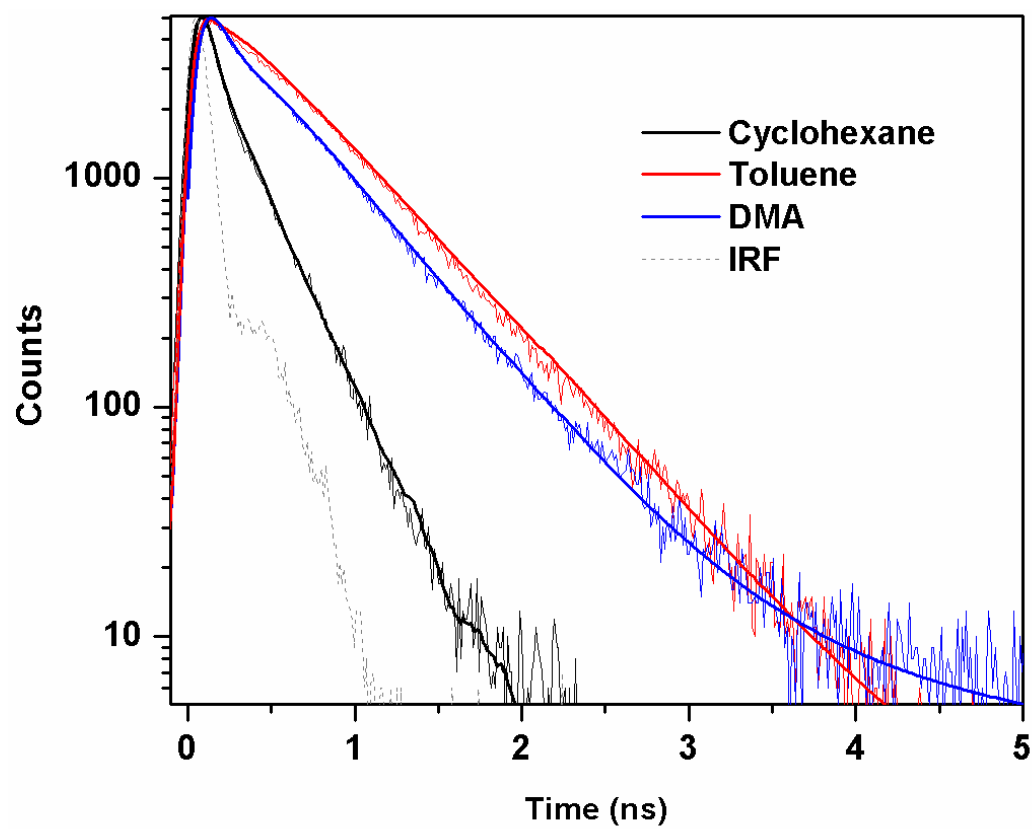

**Figure S2:** Fluorescence decays of C102 at critical mole fraction of aniline in three different solvents.

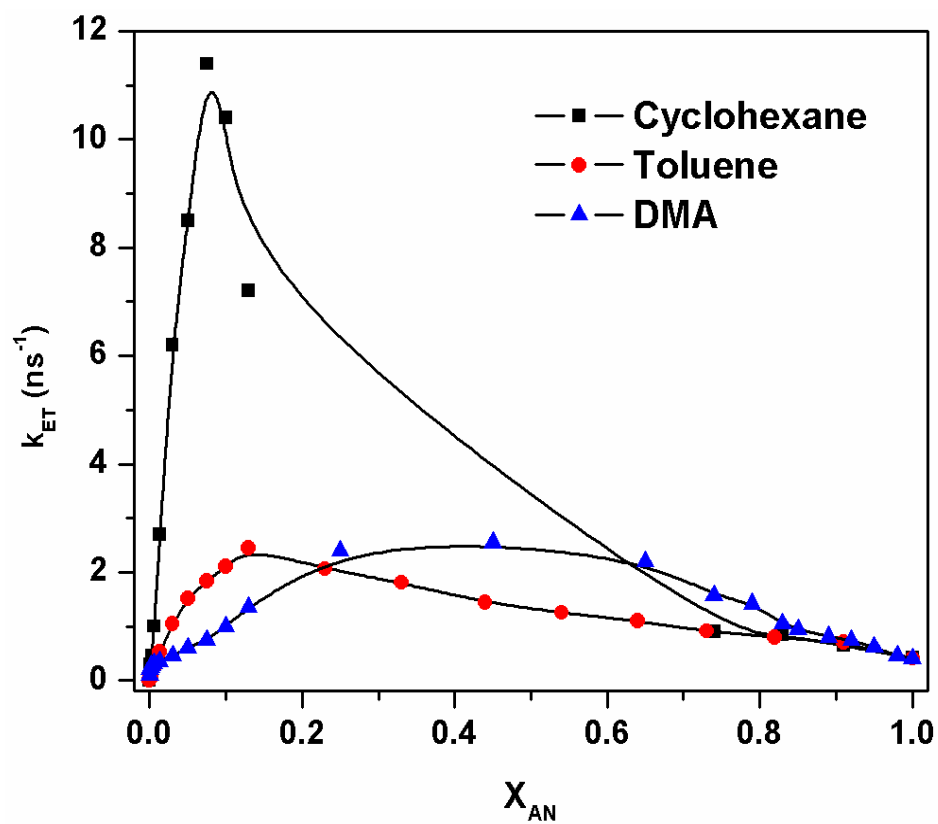

**Figure S3:** Variation of the photoinduced electron transfer (PET) rate constant,  $k_{ET}$ , of C102 with mole fraction of aniline in cyclohexane, toluene and DMA.
